# Supplementary material
Source: MDPI journal article supplement (https://www.mdpi.com/2073-4395/12/9/2172)
Supplement: s1 [file s1]

## Supplemental information

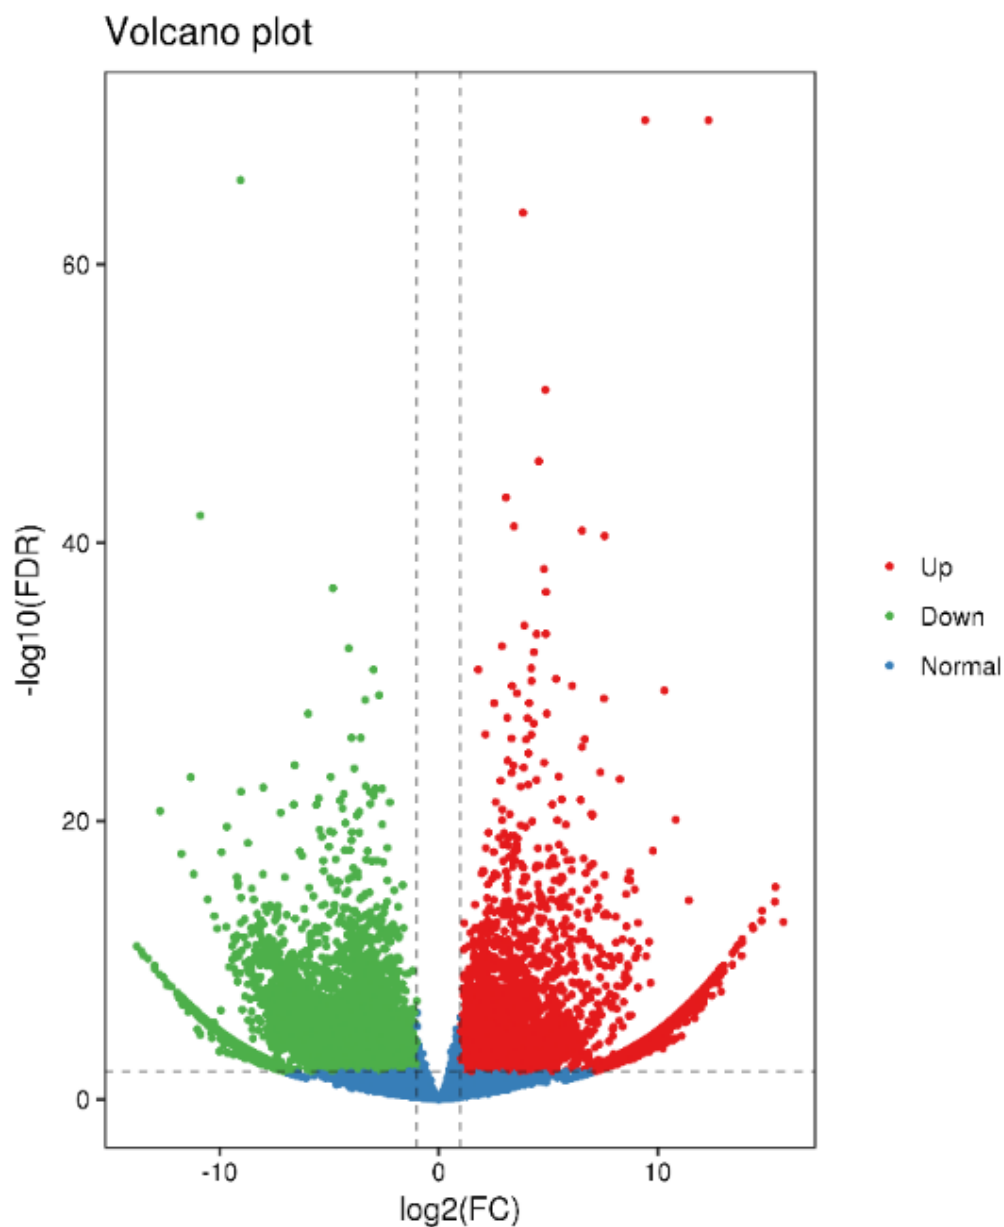

**Figure S1** Analysis of differentially expressed genes (DEGs) between resistant (R) and susceptible (S) *Alopecurus japonicus* populations. Volcano plots showing the DEGs between R and S. A value of  $q < 0.05$  was used as the threshold for the significance of DEGs. Red dots represent upregulated genes, green dots show downregulated genes, and blue dots indicate genes with no significant differences.

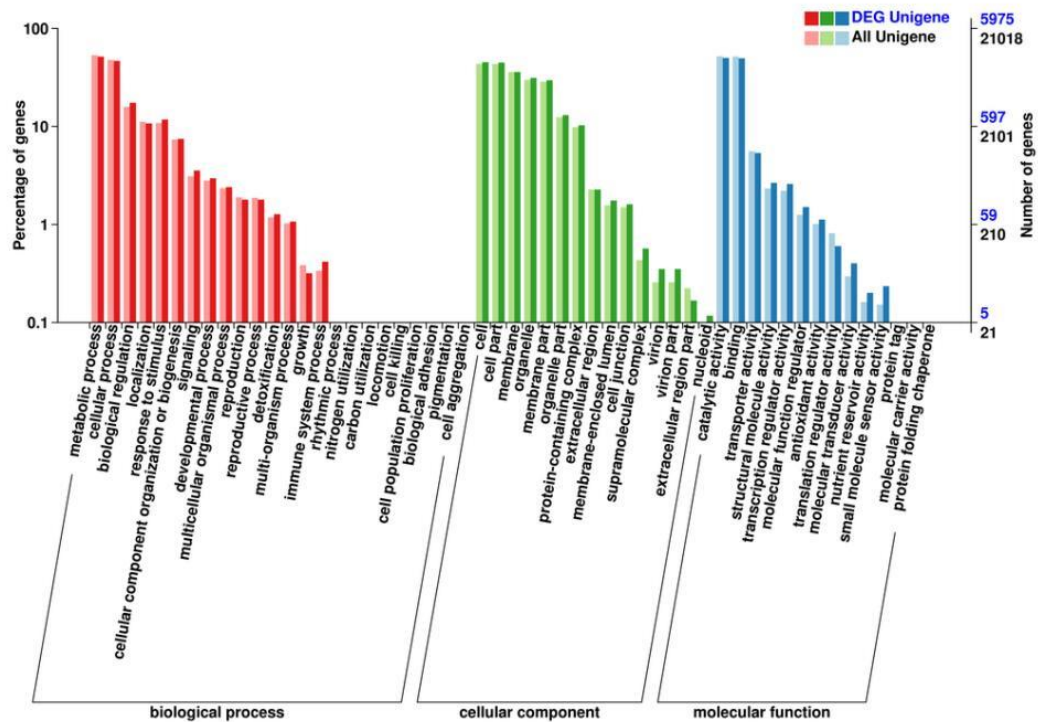

**Figure S2** Gene ontology (GO) classifications of *Alopecurus japonicus* all and DEGs according to their involvement in biological process, cellular component, and molecular function.

Table S1 Herbicides and their doses used in dose–response experiments for resistant (R) and susceptible (S) populations in *Alopecurus japonicus*.

| Group | Herbicides           | Formulation*             | Doses (g ai. ha <sup>-1</sup> )          |                                          |
|-------|----------------------|--------------------------|------------------------------------------|------------------------------------------|
|       |                      |                          | S                                        | R                                        |
| APP   | Fenoxaprop-P-ethyl   | 69 g L <sup>-1</sup> EW  | 0, 7.7625, 15.525,<br>31.05, 62.1, 124.2 | 0, 124.2, 248.4,<br>496.8, 993.6, 1987.2 |
|       | Haloxypop-R-methyl   | 108 g L <sup>-1</sup> EC | 0, 32, 64                                | 0, 32, 64                                |
|       | Quizalofop-p-ethyl   | 10% EC                   | 0, 52.5, 105                             | 0, 52.5, 105                             |
|       | Clodinafop-propargyl | 15% ME                   | 0, 45, 90                                | 0, 45, 90                                |
| CHD   | Clethodim            | 240 g L <sup>-1</sup> EC | 0, 48.6, 97.2                            | 0, 48.6, 97.2                            |
|       | Sethoxydim           | 12.5% EC                 | 0, 156, 312                              | 0, 156, 312                              |
| DEN   | Pinoxaden            | 5% EC                    | 0, 45, 90                                | 0, 45, 90                                |

\*EW, emulsion in water; EC, emulsifiable concentrate; ME, micro-emulsion

Table S2 Primers used in ACCase sequence and RT-qPCR analysis in *Alopecurus japonicus*.

| Gene    | Forward primer (5' to 3') | Reverse primer (5' to 3') |
|---------|---------------------------|---------------------------|
| ACCase  | TTTTCGAAGCTGTAACCA        | CTGACCTGAACTTGATCT        |
| UBQ     | ACCAGCAGCGTCTCATCTT       | GGCTTGGTGTAGGTCTTCTTCT    |
| GT-71C  | TATTACTCCACCCGCCAAAG      | TGGACTCTGCCATTCTGATG      |
| GT-73C  | ACCGAGACAGCAACACAATG      | TGACAAAGATTACTGAGCCTGG    |
| GT-75C  | AGAGCAGAATCGCCAATCAT      | TTTGACGCGGGGAATAGTAG      |
| GT-80B  | GTAAACTTGCCTCCCATTTGC     | TCCCACGACATCCACTAGAG      |
| GT-83A  | TTTCTGTGCTGGCCCTACTT      | CACGCCTTATCCTTCCACAT      |
| GT-86A  | CCTCTGACGGACCTCTCTTG      | GCGATAGCGACGGATTACAT      |
| GT-88B  | AGCAGTGGATGAACAAGGTG      | ACGCTCCCTTACTCCATTTG      |
| GT-89B  | TTTATTACACCCCAGCTCC       | CCAAACTCCAATGCCACAAG      |
| GT-91A  | TATGGGAGGGAAATGTGCGAG     | AGGGACGGAGCCAAGATTTA      |
| GT-92   | ATAGCCCAGTGAACCATTAC      | TCAACAGCATCGACTCCAAG      |
| ABC-B11 | CGGACGTCACCAAGAAAAAT      | CCCTCTGAGTGGCTCAAGTC      |
| ABC-B13 | TGATTCTCGTTCGCAATCTG      | CAGGAGGTTCTGATCCAAA       |
| ABC-B28 | GCGCGGTACTATGAGCCTAC      | CATGAGCATTGGCAGCTTTA      |
| ABC-C2  | CCCCTTTCTCCAATCTCTGTG     | TGGATCTTCAATGCTACCGTC     |
| ABC-C10 | TTGACGAAGCAACAGAATGC      | TGCCCCGAAAAGATAAACAG      |
| ABC-D1  | GGCTTTTCCCTTGTACCACA      | AGCTTCGTAGCCTTTGGTGA      |
| ABC-E2  | GAGGTACTGCGGGAGAACAC      | TAGCCCAGTGGACAGCTCTT      |
| ABC-G53 | GAAGTCAGCAACGCCTTTTC      | TGCTACAACCTGCACCAGAG      |

Table S3 Sequence annotation of *Alopecurus japonicus* transcriptome.

| Public database                    | Number of genes | Percentage (%) |
|------------------------------------|-----------------|----------------|
| Annotated in COG                   | 10824           | 12.03          |
| Annotated in GO                    | 21017           | 23.36          |
| Annotated in KEGG                  | 20473           | 22.76          |
| Annotated in KOG                   | 15874           | 17.65          |
| Annotated in Pfam                  | 19418           | 21.59          |
| Annotated in Swissprot             | 22930           | 25.49          |
| Annotated in nr                    | 35108           | 39.03          |
| Annotated in at least one database | 37723           | 41.94          |
| Total genes                        | 89951           | 100.00         |
